# Supplementary material for: Molecular fingerprints resolve affinities of Rhynie chert organic fossils
Source: PubMed Central journal article supplement (PMC10011563; doi:10.1038/s41467-023-37047-1), 2023-03-13
Supplement: 41467_2023_37047_MOESM3_ESM.pdf [file 41467_2023_37047_MOESM3_ESM.pdf]

**Supplementary Data 1.** List of specimens, coordinates, and repositories. Specimen codes: 2829p: Oxford University Museum of Natural History. Rfa, Rfe, Rff, Rfg, ALG2, AGLyon 2019, AGL127, Agl75 2019-1: University of Aberdeen. NMSRC9: National Museums of Scotland.
